# Supplementary material for: Imaging Minimal Bacteria at the Nanoscale: a Reliable and Versatile Process to Perform Single-Molecule Localization Microscopy in Mycoplasmas
Source: PubMed Central journal article supplement (PMC9241803; doi:10.1128/spectrum.00645-22), 2022-05-31
Supplement: spectrum.00645-22-s0001.pdf [file spectrum.00645-22-s0001.pdf]

### A. Mycoplasma cell deposition

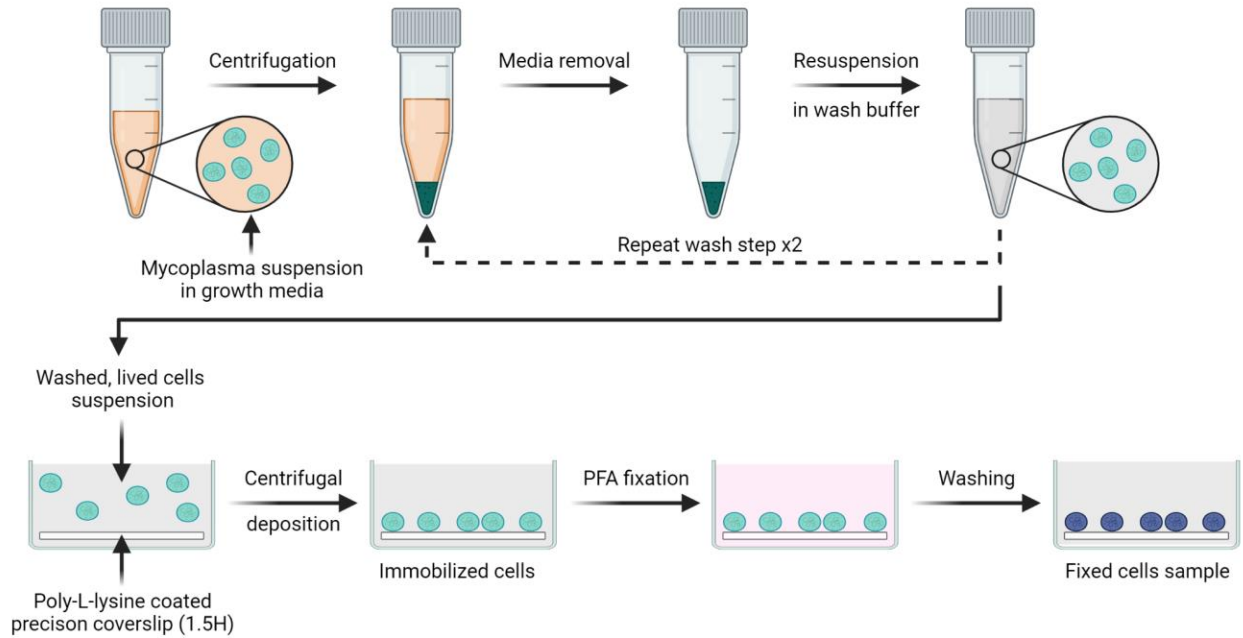

### B. Coverslip quality control

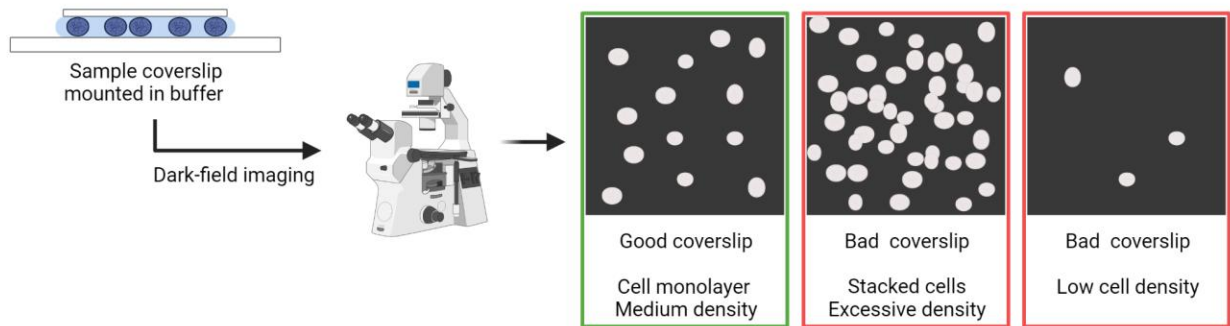

### C. PALM imaging

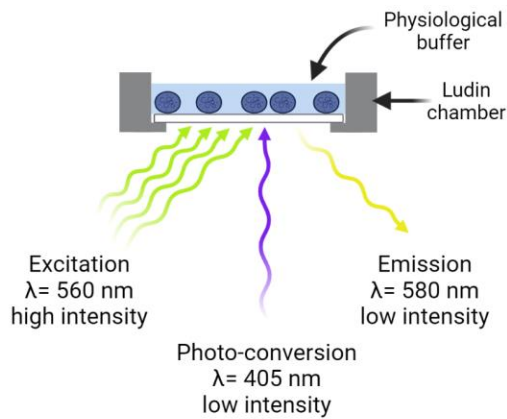

### D. dSTORM imaging

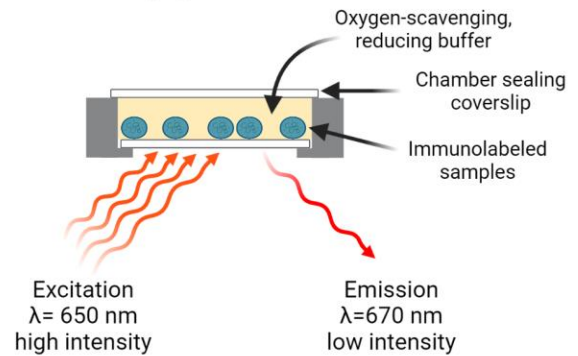

**Figure S1: Schematic overview of the SMLM samples preparation process.** **A.** Mycoplasma cells deposition and fixation on coverslips. Cells grown in culture media are harvested and washed, then deposited on poly-L-lysine coated coverslips using centrifugation to force the cells to sediment. After PFA fixation, the coverslips can be further processed by immune-labeling or used directly. **B.** Quality control of the sample coverslips. In order to check the proper deposition of cells on the coverslip, and to gauge the cell density, coverslips are mounted on glass slides (cells facing the glass) using a mounting buffer. Dark-field imaging is then performed to assess the samples. **C.** Schematic overview of the PALM imaging process. The coverslip is mounted in a Ludin chamber, filled with PBS buffer. Imaging is performed by providing continuous excitation illumination at medium intensity while simultaneously illuminating the sample with low-intensity ultra-violet light to photo-convert the fluorescent protein. **D.** Schematic overview of the dSTORM imaging process. The coverslip is mounted in dSTORM imaging buffer, in a sealed Ludin chamber. Imaging is performed by providing continuous excitation illumination at high intensity in order to send the fluorophores to their dark state.

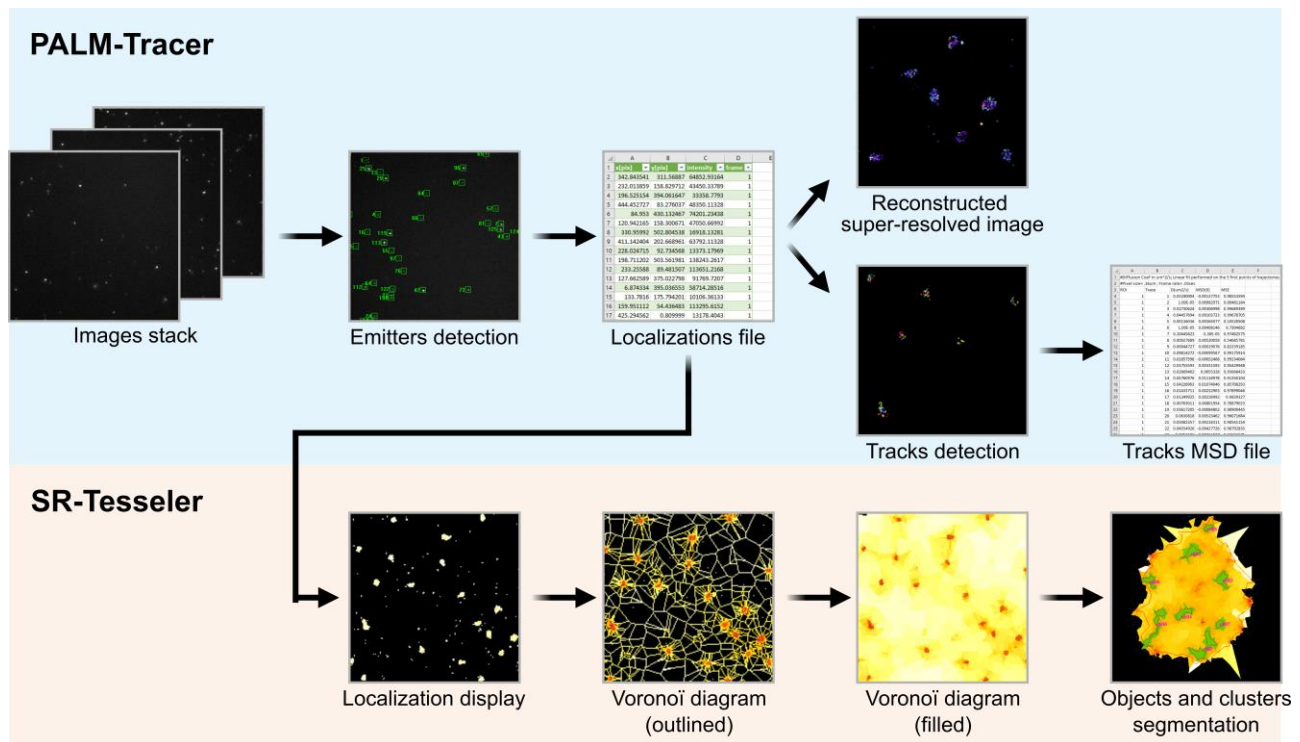

**Figure S2. Schematic overview of the SMLM imaging data processing.** Images stacks collected during data acquisition are processed using the Metamorph plug-in PALM-Tracer. Emitters are detected on each frame, and their localizations are computed by Gaussian fitting, yielding a localization file indicating for each emitter an x and a y localization value, an intensity value, and a frame number. This localization file is then used to reconstruct a super-resolved image, and to create emitters tracks from which the MSD values are derived. SR-Tesseler is used in parallel to analyze the localization file. First, a Voronoi diagram is computed, based on which objects (red outline) and clusters (green fill) are automatically segmented based on set density, detection and size threshold parameters.

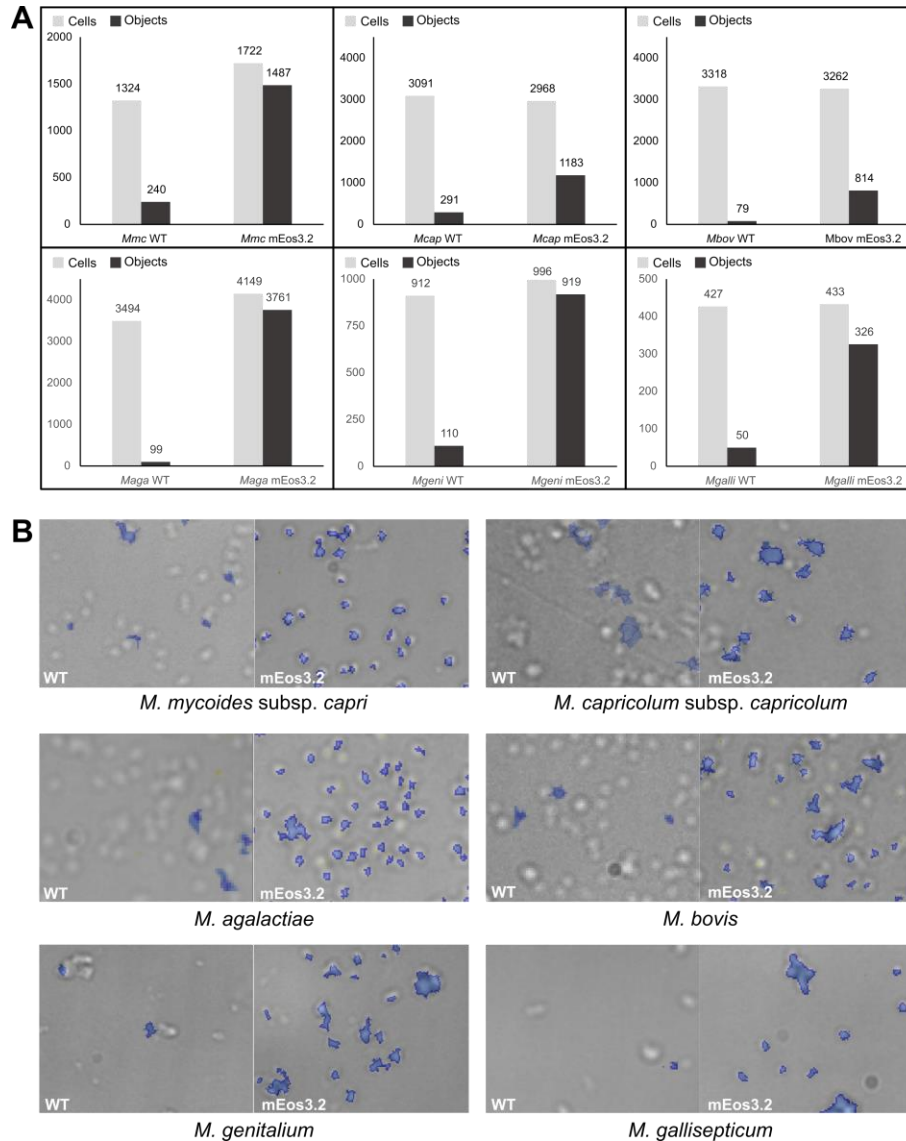

**Figure S3: Assessing the functionality of the photo-convertible fluorescent protein mEos3.2 in multiple *Mycoplasma* species.** Six mycoplasma species were transformed with the plasmid pMT85-PSynMyco-mEos3.2 and imaged by PALM (see Figure 1). The data presented here correspond to a single representative field of view (512x512 pixels; pixel size: 160 nm). **A.** Comparison of the number of cells and Tessler segmented objects in the field of view. The bar graph indicates the number of objects segmented by Tessler (equivalent to a cell) compared to the number of actual cells found in the imaged field. **B.** Localization of the Tessler objects compared to the mycoplasma cells. Sample images show the overlay of a contrast-phase image and of the objects segmented by Tessler (blue) in the same field.

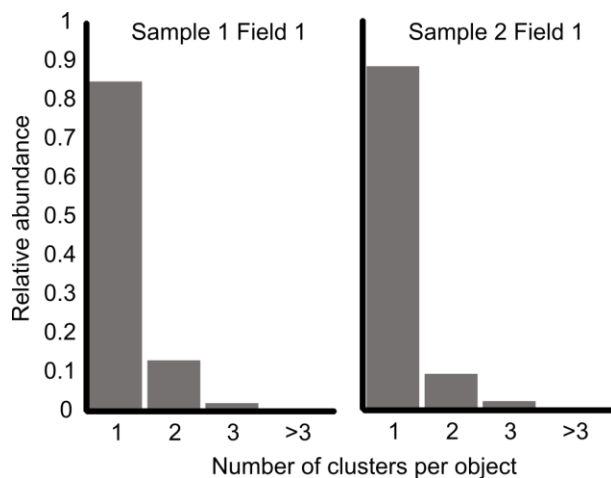

**Figure S4: Tesseler clustering of mEos3.2 localizations in the cytoplasm of *Mycoplasma mycoides* subsp. *capri*.** *Mmc* pMT85-PSynMyco-mEos3.2 cells were imaged using PALM, and Tesseler clustering of the fluorescence signal was performed. For each dataset, the number of clusters per Tesseler-segmented object was computed. The bar graphs display the distribution of the number of clusters per object. The data presented here correspond to two fields of view (512x512 pixels; pixel size: 160 nm), taken from two independent coverslips.

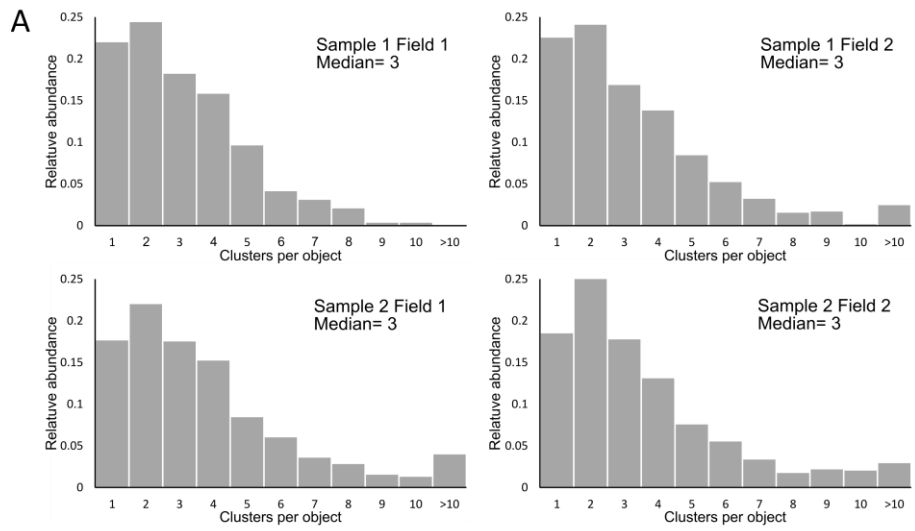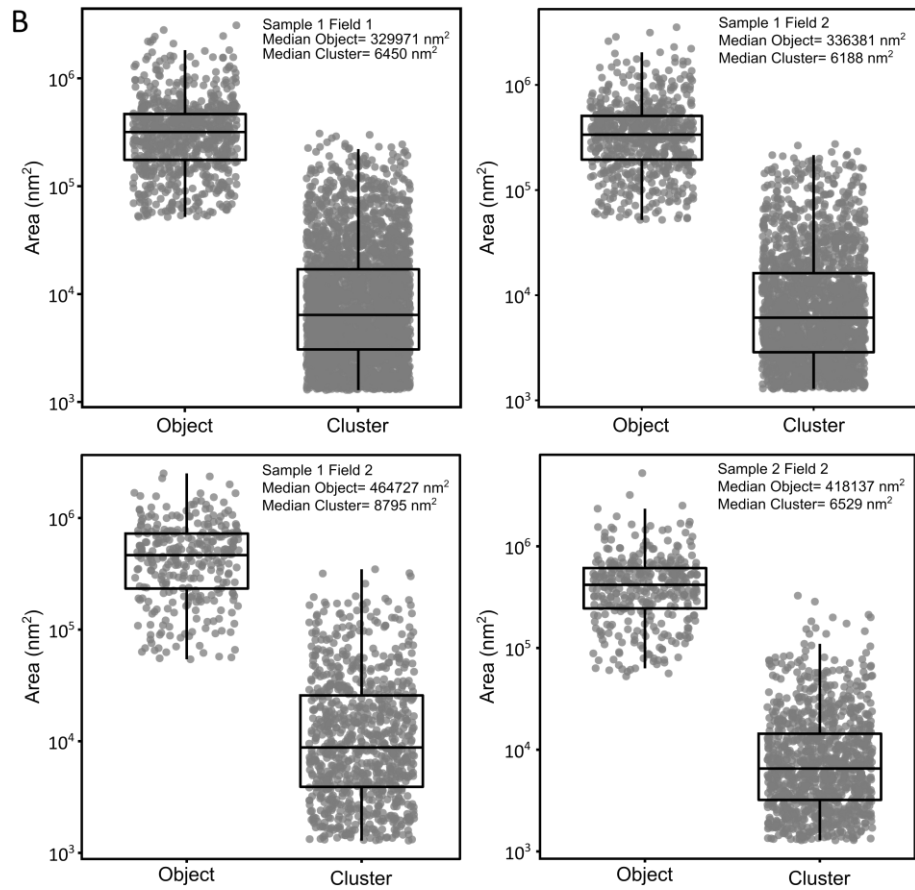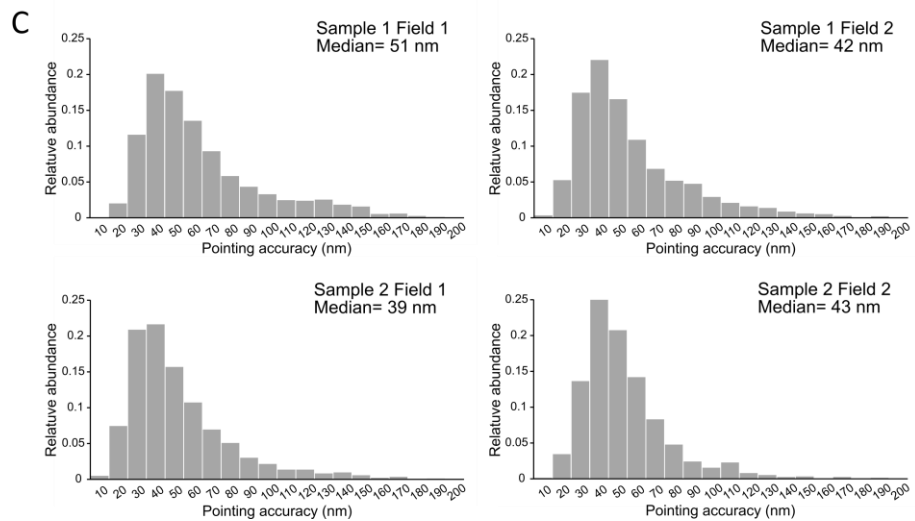

**Figure S5: Replicates of the PALM imaging of an F-type ATPase in *Mycoplasma mycoides* subsp. *capri*.** *Mmc* 0575-mEos3.2 cells, expressing a mEos-fused variant of the  $\beta$ -subunit of the ATPase F<sub>1</sub>-like domain, were imaged by PALM (see Figure 2). The data presented here correspond to four fields of view (512x512 pixels; pixel size: 160 nm) taken from two independent coverslips. **A.** Tesseler clustering of the fluorescence signal. The number of clusters per Tesseler-segmented objects was computed. The bar graphs display the distribution of the number of clusters per object. **B.** Objects and clusters sizes. The dot plot presents the area (in nm<sup>2</sup>) of each object and cluster segmented by Tesseler, to which a boxplot showing the median, interquartile range, minimum and maximum is overlaid. The median value of each data set is indicated. **C.** Evaluation of the PALM imaging pointing accuracy. The bar graphs display the distribution of the pointing accuracy derived from each track. The median value of each data set is indicated.

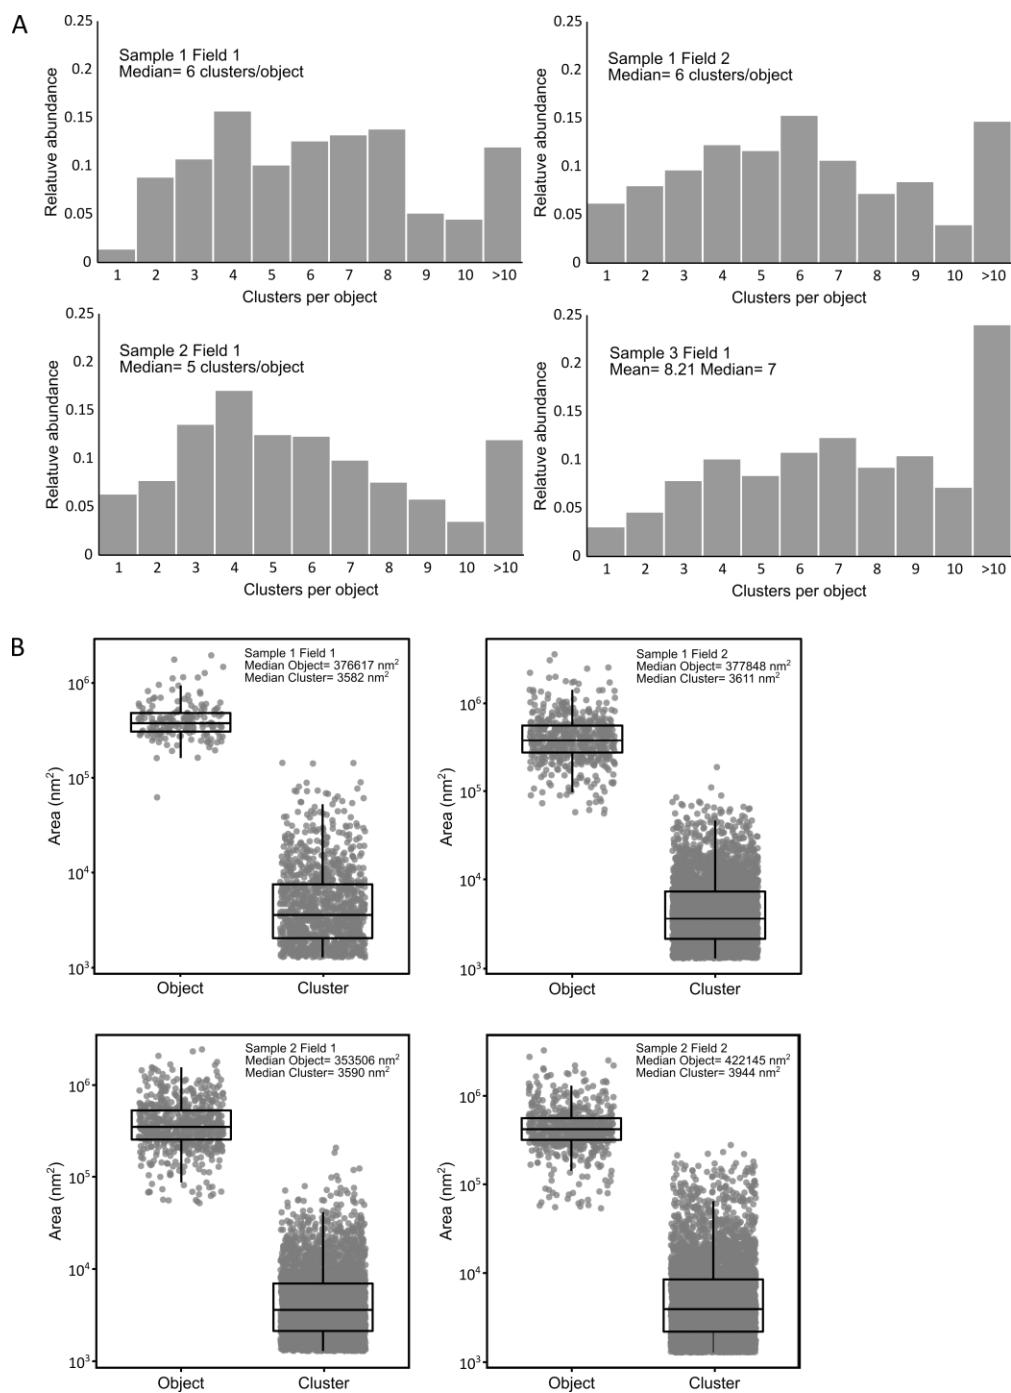

**Figure S6: Replicates of the dSTORM imaging of an antibody-specific protease in *Mycoplasma mycoides* subsp. *capri*.** *Mmc* 0582-HA cells expressing an HA-tag fused variant of the serine protease MIP<sub>0582</sub> were immune-labeled and imaged by dSTORM (see Figure 3). The data presented here correspond to four fields of view (512x512 pixels; pixel size: 160 nm) taken from two independent coverslips. **A.** Tesseler clustering of the fluorescence signal. For each field of view, the number of clusters per Tesseler-segmented objects was computed. The bar graphs display the distribution of the number of clusters per object. **B.** Objects and clusters sizes. The dot plot presents the area (in nm<sup>2</sup>) of each object and cluster



segmented by Tesseler, to which a boxplot showing the median, interquartile range, minimum and maximum is overlaid. The median value of each data set is indicated.

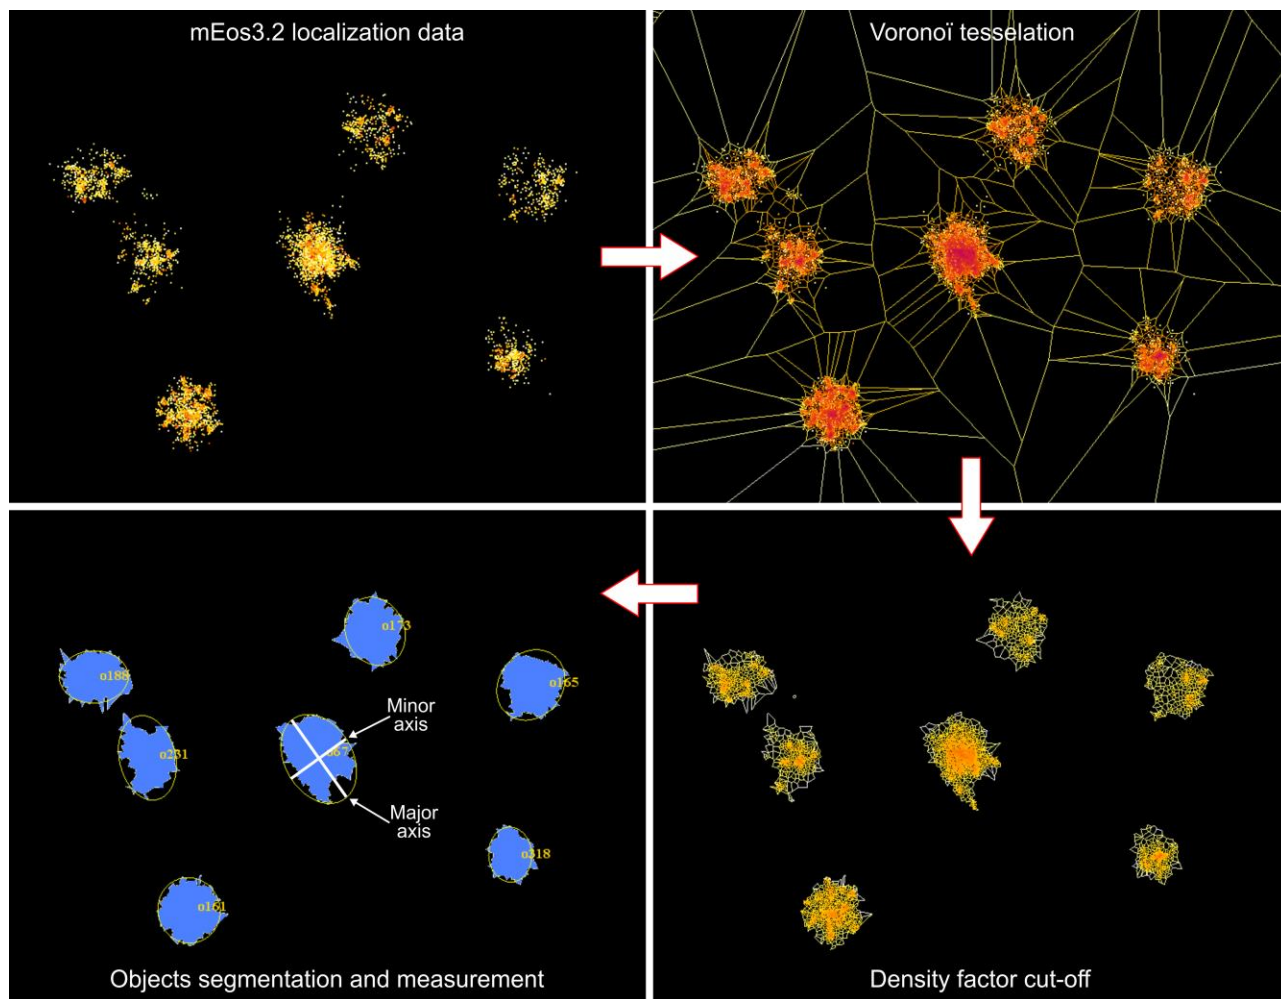

**Figure S7: Schematic overview of the cell size estimation from PALM imaging data.** Top-left: localization data collected from *Mmc* cells expressing the mEos3.2 as a soluble monomer in the cytoplasm are displayed in Tesseler. Top-right: Voronoi tessellation of the localizations (no density cut-off). Bottom-right: Voronoi tessellation of the localizations is performed again after setting a density factor cut-off (here: 1) in order to filter the signal coming from outside the cells. Bottom-left: Tesseler objects are segmented and their dimensions (major axis and minor axis) are computed.

**Supplementary Material:**  
Fusion proteins coding sequences

>MMCAP2\_0582-HA

ATGAAAAGATTGAATAAATTATTGATGTATATATCATCATCAACACTTCTACTCCCGATTACT  
TTATTAGTTGCTTGTACTCCTTCTAAAGTAGTTGCTAAACCAATTAATGATGATGAATTTAAC  
AAGCTTATTGATTCTATAAAAACTGAAAATGATCTTTTAAAATATGCTGATATTAGATTTAAA  
AATCCTAATGGTGCAGATACTAAAAAGAAGACATAATACCTTCACAACATAAAAAGTGAAA  
ATATAAGTATAACTTTCAAAGGTAAATATCAAGGACAAATTAGTGCAGTAGTTACAAATGTA  
GATGTTGATAGAACAACCCTTTTGCAGTACAAAATGAAGCTACAATATTTGTTCAATTTAA  
AAATCTTAAAACAAATACATCAAAACCTATAAGTATTACTATTAAAGGATTGAATCAAAAAG  
GTAATTTTGATGCTTCTGGGAATATAGTGGTGGATGATTTTGCATATTTTGGTGGGACTAGTG  
GATATGATGAGTATACTAAGAAAGACCAAAAATCAAGGTTTGATTATGATAATGAAAGATA  
TATGACTAGATTGAAAAGTCAATTTGGTAATAGTTCAAATTCATAAATCTAAAAGAGTATA  
GAGGTCTAGAAACAAAGCAAGAAAACATTA AAAAATTTGATGATCAAGCAGCAATTAGTAA  
CTTTGACACCTATTATAATGCTGCGTTAAAAGGATTTACTTTACCTGTATATGGTAGTGATGG  
AAAAGTAAGCGGTTTAAAATTTATGAAGGAGCAGAAATAGGAAAAGGTCCTTCAGTTGTTG  
ACTCACTAGGTAGAAATGAAAAGCTAAAACCTGTTGGATTAGCTAGA ACTTTACCTAATGAA  
GAGTATAAAACATCAGCTATTCAGACTTTTCAAACAAACTTTACAATCTATAAAGATTATGA  
AAAAGAGATAGAAGAAGCAGAAGATAACATAAAAATTTATTGATTCTTGAAATGAACAACAA  
ATTCAAAGTTATATTTTCAGCACAGTTAACACAATTAAGGCTAAATTATGAGGATGAAGTTTCT  
CAAATAGATAGAGAAATATCTCAAACACAACCTGATAAAAACA ACTATACTATCAAATCTTAA  
TCAAAGAAATCAAAGATAGAATCTGAGTATCAAAAAGAGTTGTCAACAATATCAA AATTA  
AACAAAGATAGTCTTAAAGAATGGCAAAGAAAAGAAATGAAAAATATAATGAAAAGAAA  
AAAGAAAAAACATTTCAAATTTCTGAATCTGGAACAATGTGAATAATGGATTATTTAGATGA  
AAATGCTGGGAAGAATCCA ACTAAATTTTACTTTGGA ACTA ACTCACACGTTGCTAAAGGAA  
TTAAAGATGGTATGGTTTCTTTCTTTAACTAGATTA AATTCAGAGGTTAAAGTAGGTCAA  
CATTTAAATTA AATGGGCATGATAGCAATTTTACTAAATTTACATTTTCTCCAATTAATGGTA  
ATAA ACTTG AAGATGCTGTTACTGCAATTTTTTCATGCAACTGATTTTATAAATGAAAATAGCA  
GTCCACTTAAATTA CTAGATTCTGAGCAAAAGTCTAAATATAATGGCGCTGGGATATTTGCTG  
ATTTTGCTATTGTTGAAGTTGATTTTGCAAACTACTAGACAAAGGCAAATATTCATATTCTG  
TGTGAAGCGCTTCTAATGATATAACAAATCAATATGAAACTGAGCAA AATAAATTAATTAGC  
AAAATAACTAATAATTA CTAGAAAGTGATAAAAAGGTTAAGTTTTTCTCTGATTCTTTATTA  
AACGAACAAACTTATGCTAAATTTGATAGACCACTTGATTTTGATCCTAAAAAAGAAGATGA  
ATTGAAAAAATATAACGATTTAGATAGTCTATACATAGTTGGTTATCCTACAGCTTATAAAG  
ATTTTTATTTAGATCAGTATGAAGATGAAAAACA ACTAAAAAATAAAAAATATGATTTTCA  
TTGTGAATTAATAGTGAGTATAAATTTCTATAATAA ACTAATTAATAAGGAAGGTTCAACTAA  
TTCATTTAAAGAATATGAAACAGGAAAAGGTAATTTCTTTTCATACCAAATTGGATATCGTTC  
ATTTATTGATAAGCCAGGATTGACTGATGCTTTTATAA ACTGTTAACAAAGTCGGTAAAAAATT  
ATATTCATTA AAAAGATAAAAATAAAAAATGAAGTTAAAAAATACTTCAATTATGGTTTAGAAA  
TACTTCCAAGATTTTATGCACCAGCTGGTGGAGCTTCTGGTTCTAGTGTTAGA ACTAAAGATA  
ATAAATTA CTAGCTGTATATCACGCATCAAACGAAACAGCTAGA ACTGGTTTAGCTGTTGCA  
TTTAGATCTGATGGTTATGATTATAAAAACTTATTTGGTGATTATAAATTAGGTCAATATGAT  
TTAATTTATGGTGGTGGAAAAGACCAACAAAAGAAAATCATATAGAGAAGTTATGAATA  
AAATGTATAGCGGTAAGAAAAGCGCATTATTCAAAATGGATTTACTGATGACAAAATCCCA  
TCTGAATTTAAATTCAATAATTCAACACAAA ACTATCCATATGATGTTCTGATTATGCTTAG

>MMCAP2\_0575-mEos-Nt

ATGTCAGCTATTAACCAGATATGAAAATTAATTAAGAATGGAAGGAAATGTAAATGGAC  
ATCATTTTGTAAATAGATGGAGATGGTACTGGTAAACCATTTGAAGGTAAACAATCAATGGAT  
TTAGAAGTTAAAGAAGGTGGTCCATTACCATTTGCTTTTGATATTTTAACTACTGCTTTTCATT  
ATGGTAATAGAGTTTTTGCTAAATATCCAGATAATATTCAAGATTATTTTAAACAATCATTTTC  
CAAAAGGTTATTCATGAGAAAGATCATTAACTTTTGAAGATGGTGGTATTTGTAATGCTAGA  
AATGATATTACTATGGAAGGTGATACTTTTTATAATAAAGTTAGATTTTATGGTACTAATTTT  
CCAGCTAATGGTCCAGTTATGCAAAAAAAAAACTTTAAAATGAGAACCATCAACTGAAAAAAT  
GTATGTTAGAGATGGTGTTTTAACTGGTGATATTGAAATGGCTTTATTATTAGAAGGTAAATGC  
TCATTATAGATGTGATTTTAGAACTACTTATAAAGCTAAAGAAAAAGGTGTAAATTACCAG  
GTGCTCATTTTGTGATCATTGTATTGAAATTTTATCACATGATAAAGATTATAATAAAGTTA  
AATTATATGAACATGCTGTTGCTCATTACAGGTTACCAGATAATGCTAGAAGAGGATCAGGA  
TCAGGATCAAACGGAAAAATTTTAAAGTATATCTGGTGATGTAATTGAAGTACAATTTGAAAA  
AAGCAATTTGCCTTCAATTAATCACTTATTAACAACATCATGATAATCAAACATATTTATTAGT  
AAAAAGTGTATTAATGAAACTAACATTAAGCAATCATCATTTATGCATATAAACAAATTT  
CACTAAGCGATGAAATTATAAATACTAATAAAAAGTTTTATGGTCCAGTAGGAAGTAAAGCA  
AAAAACAACATTTTACTGGAATTTCACTAAACAATAAAAAAGATGATAAACAAGA  
ATATGTTGAAATGAATTCACTATTAATAATAAAAAGAGAATTAAGCACTGAATTTGAACTAA  
TTGAAACAGGTATTAAGCGATTGACTTTTTTATTCCAATTTTTAAAGGATTTAAATTAGGAA  
TTTTTGGTGGAGCTGGTGTGGTAAAACAGTTTTAATGAAAGAAATCATTTTTAATGTTAATA  
ATAAATATAAAAACACTTCAAATATTTTTATTGGATCAGGTGAACGTTCAAGAGAAGGTATT  
GAACTTTATGATGAACTAACTGAATCTAATTTAATGAAAAATTCAACTATGTTTGTCTAAA  
ATGAACGAATCTCCAGGAGCACGTATGTCAATTGTTCCAATTGGAGTTACTGCTGCTGAGTAT  
TTAAGAGATGTTAAAAAGAAGATGTTTTATTATTATTGATAATTTTATCGTTTTATTCAA  
GCAGAAAATGAAGTAAGTGCTACACTTGGTAAAAAACCTTCAGTTGGTGGGTATCAATCTAC  
ACTAGAAAGTGATGTTGCAAATATTCAAGATCGTTTATTTAAAAATAAAAAACGGAGCGATTA  
CTTCATTTCAAACACTGTGTTTTTACCAATGGATGATTTAAGTGATCCATCAGCTGTAGCTGTATT  
TAATCATTTAGATTCAAATCTAGTTTTATCAAGAGATCAAGCTGCAAAAAATATTCTTCCTGC  
TTTTGATCCACTAGCAAGTTCTTCTAGTTCAGTTGATGAACTTTAATTGGTAAAAAACACTT  
TAATGCCATTATTGAAGTTAAAAGAATTTTAAAAGCTTATAAAGATTTAGAAGATGTTATTTT  
AATTTTAGGATTTGATGAATTAGATGCTGAAAGTAAAATTTTAGTTAAAAAAGCTTTACAATT  
AGAAAATTTCTTTACTCAATATTTCTTTATGACTGAACAATTTACAAAACAAAAAGGTCAATA  
TGTACTTTTAAATGAAACAATTGATAGTGTTATTAGAATTATTGAAGGAAAAATATATTAAC  
AATCTCTGAAATCTTTTCATATATTGGTTCAGCTTTAGATTTAAAAACTGATGAAGAATTAG  
GATTATAA
